# Supplementary figures and images for: Physical and Functional Interactions between Pathogen-Induced Arabidopsis WRKY18, WRKY40, and WRKY60 Transcription Factors
Source: Oxford University Press journal article supplement (doi:10.1105/tpc.105.037523), 2006-04-07

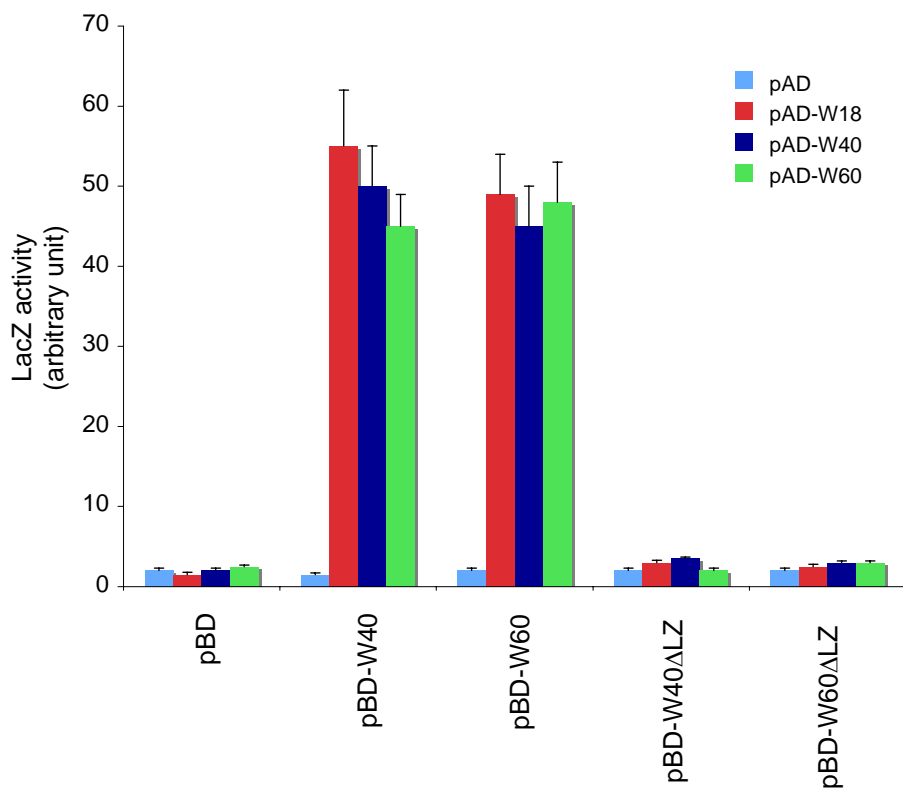

Supplement: plcell_v18_5_1310_s1.zip [file plcell_v18_5_1310_s1.zip]

Supplemental Figure 2

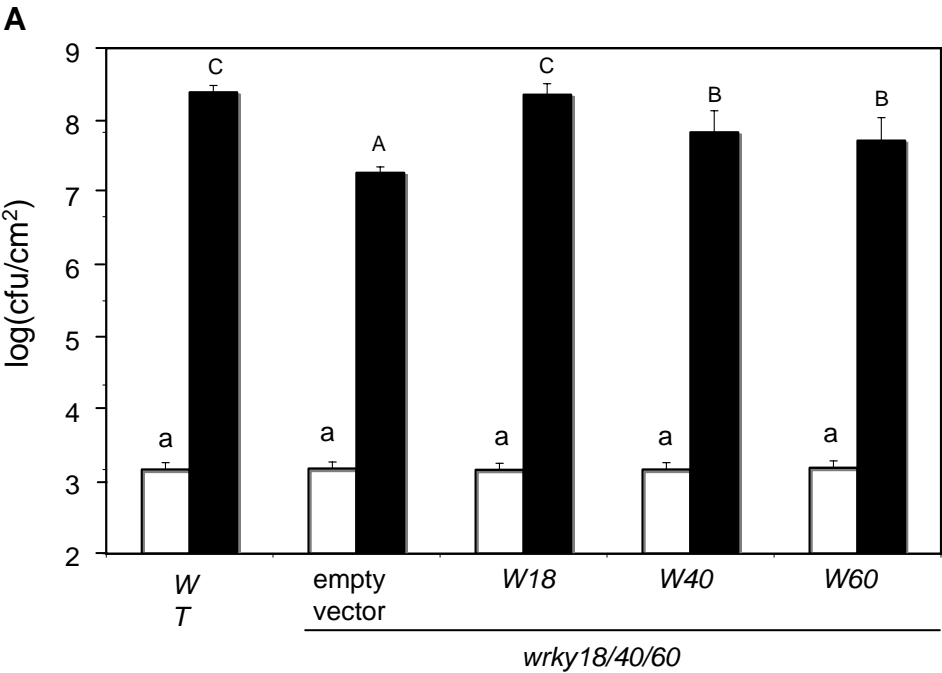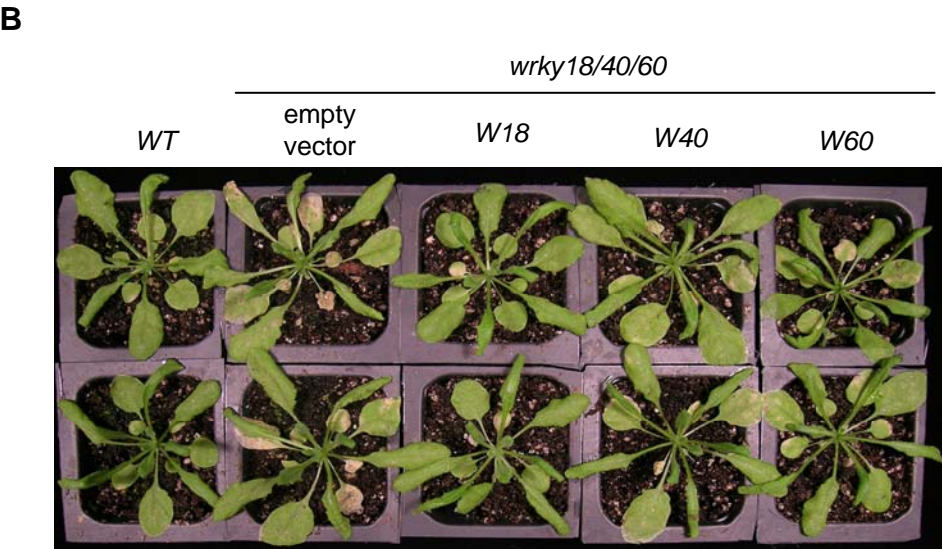

Supplement: plcell_v18_5_1310_s1.zip [file plcell_v18_5_1310_s1.zip]
